# Supplementary material
Source: PubMed Central journal article supplement (PMC6176717)

# Supporting Figure 1

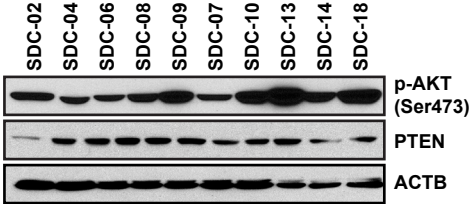

## Supporting Figure 2

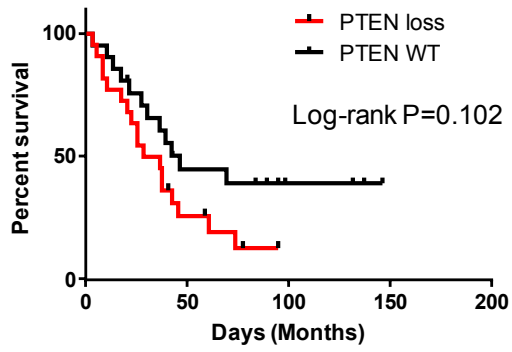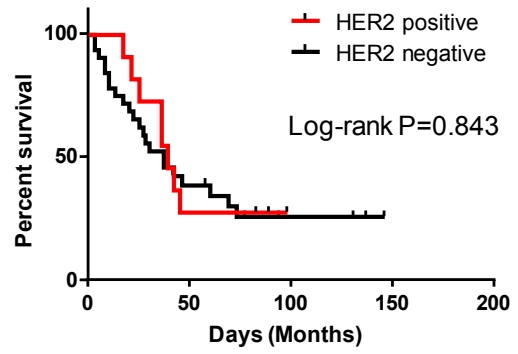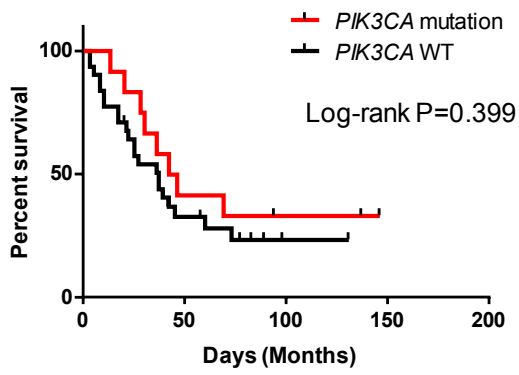

Supplement: NIHMS970982-supplement-Supp_Figures.pdf [file NIHMS970982-supplement-Supp_Figures.pdf]
